# Supplementary material
Source: publisher figshare collection journal article supplement (https://sage.figshare.com/ndownloader/files/20475834)
Supplement: Supplementary file 1 [file 20475834]

**Supplemental File 2 R Script for calculation of correlation in the presence of spatial autocorrelation.**

|                              |                                                                                                                                                                                          |
|------------------------------|------------------------------------------------------------------------------------------------------------------------------------------------------------------------------------------|
| <b>Article title:</b>        | Assessing geographical representativeness of crowdsourced urban mobility data: an empirical investigation of Australian bicycling                                                        |
| <b>Journal name:</b>         | Environment and Planning B                                                                                                                                                               |
| <b>Authors:</b>              | Lieske SN <sup>1</sup> , Leao SZ <sup>2</sup> , Conrow L <sup>3</sup> , Pettit C <sup>2</sup>                                                                                            |
| <b>Affiliations:</b>         | <sup>1</sup> The University of Queensland Brisbane Australia 4072<br><sup>2</sup> The University of New South Wales Sydney 2052<br><sup>3</sup> Arizona State University Tempe, AZ 85281 |
| <b>Corresponding author:</b> | <a href="mailto:scott.lieske@uq.edu.au">scott.lieske@uq.edu.au</a>                                                                                                                       |

```
23
24 #calculation for a single SA2
25 library(foreign) #for importing .dbf files
26 library(spatialPack)
27 SA2poly504011047.dbf <- read.dbf("C:/R/Corspatial/SA2poly202011019.dbf")
28 x <- SA2poly504011047.dbf$RL_VIC
29 y <- SA2poly504011047.dbf$ABS
30 coords <- SA2poly504011047.dbf[c("INSIDE_X","INSIDE_Y")]
31 Dutilleul.test <- modified.ttest(x, y, coords)
32 Dutilleul.test$corr
33 Dutilleul.test$p.value
34 |
```
